# Supplementary material for: KR-12 coating of polyetheretherketone (PEEK) surface via polydopamine improves osteointegration and antibacterial activity in vivo
Source: Royal Society of Chemistry journal article supplement (doi:10.1039/d0tb01899f), 2020-01-01
Supplement: d0tb01899f1.pdf [file d0tb01899f1.pdf]

Figure S1 The constit

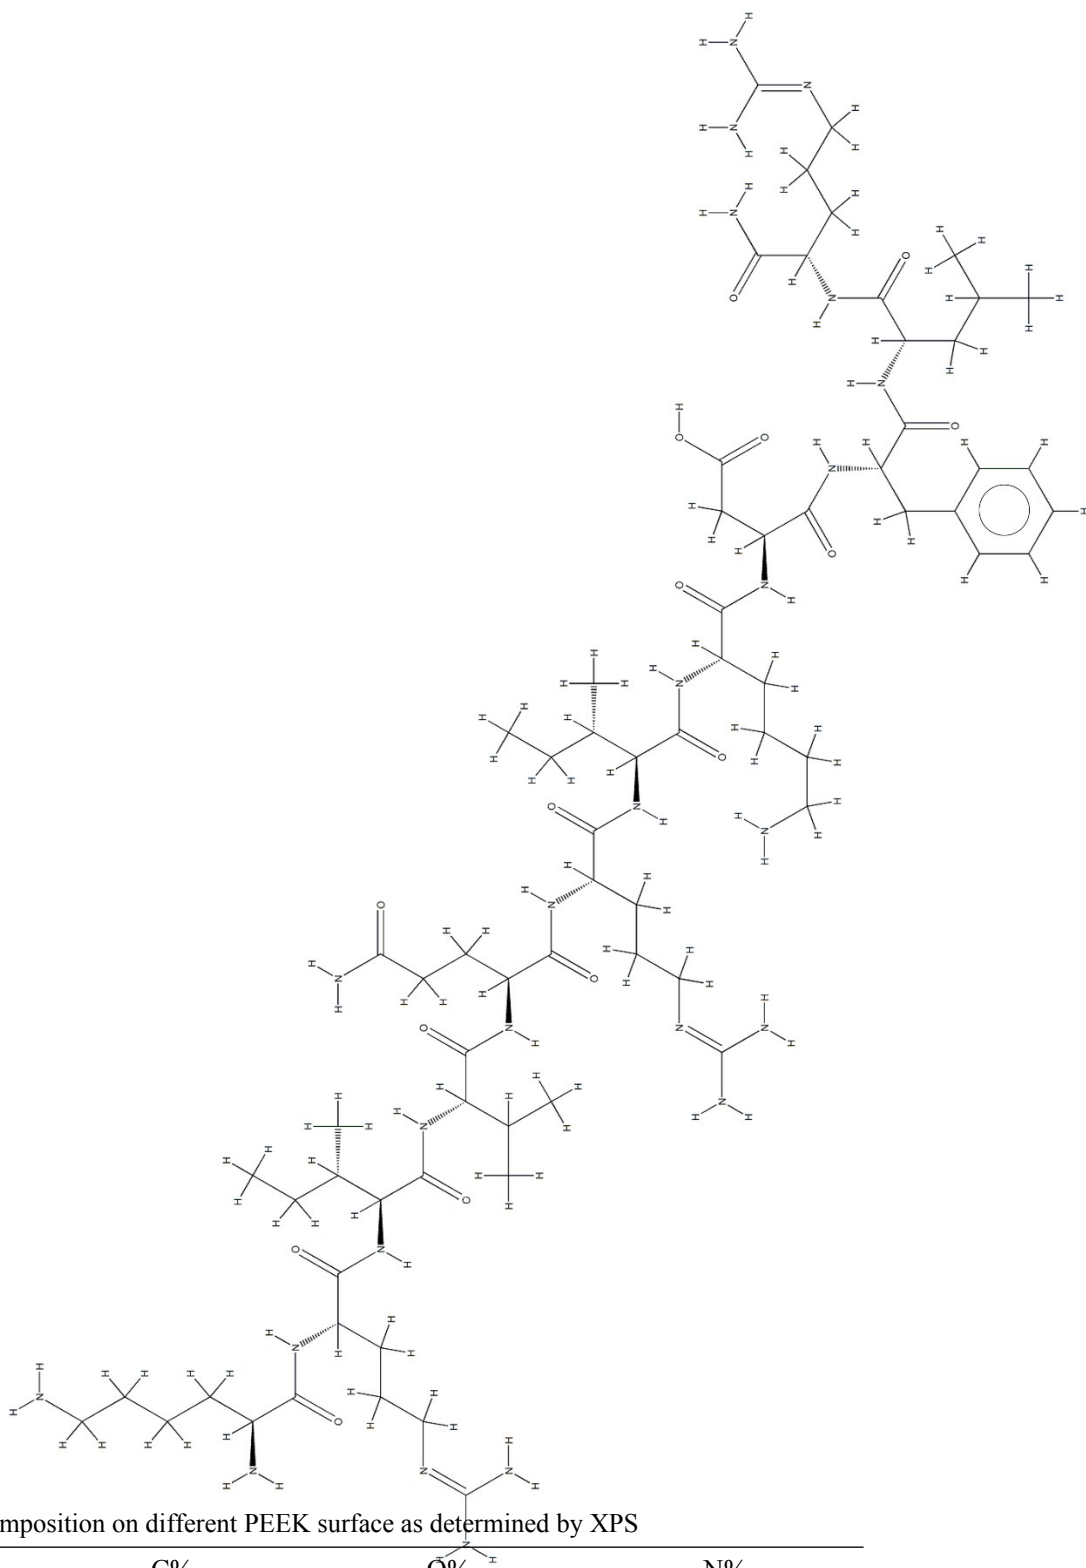

Table S1 Elemental composition on different PEEK surface as determined by XPS

| Substrate     | C%    | O%    | N%    |
|---------------|-------|-------|-------|
| PEEK          | 80.49 | 19.51 | --    |
| PEEK-PDA      | 79.81 | 16.39 | 3.8   |
| PEEK-PDA-KR12 | 73.61 | 15.81 | 10.58 |

Figure S2

The complete core level spectrum including enough background and spin orbit component.

## 1. PEEK

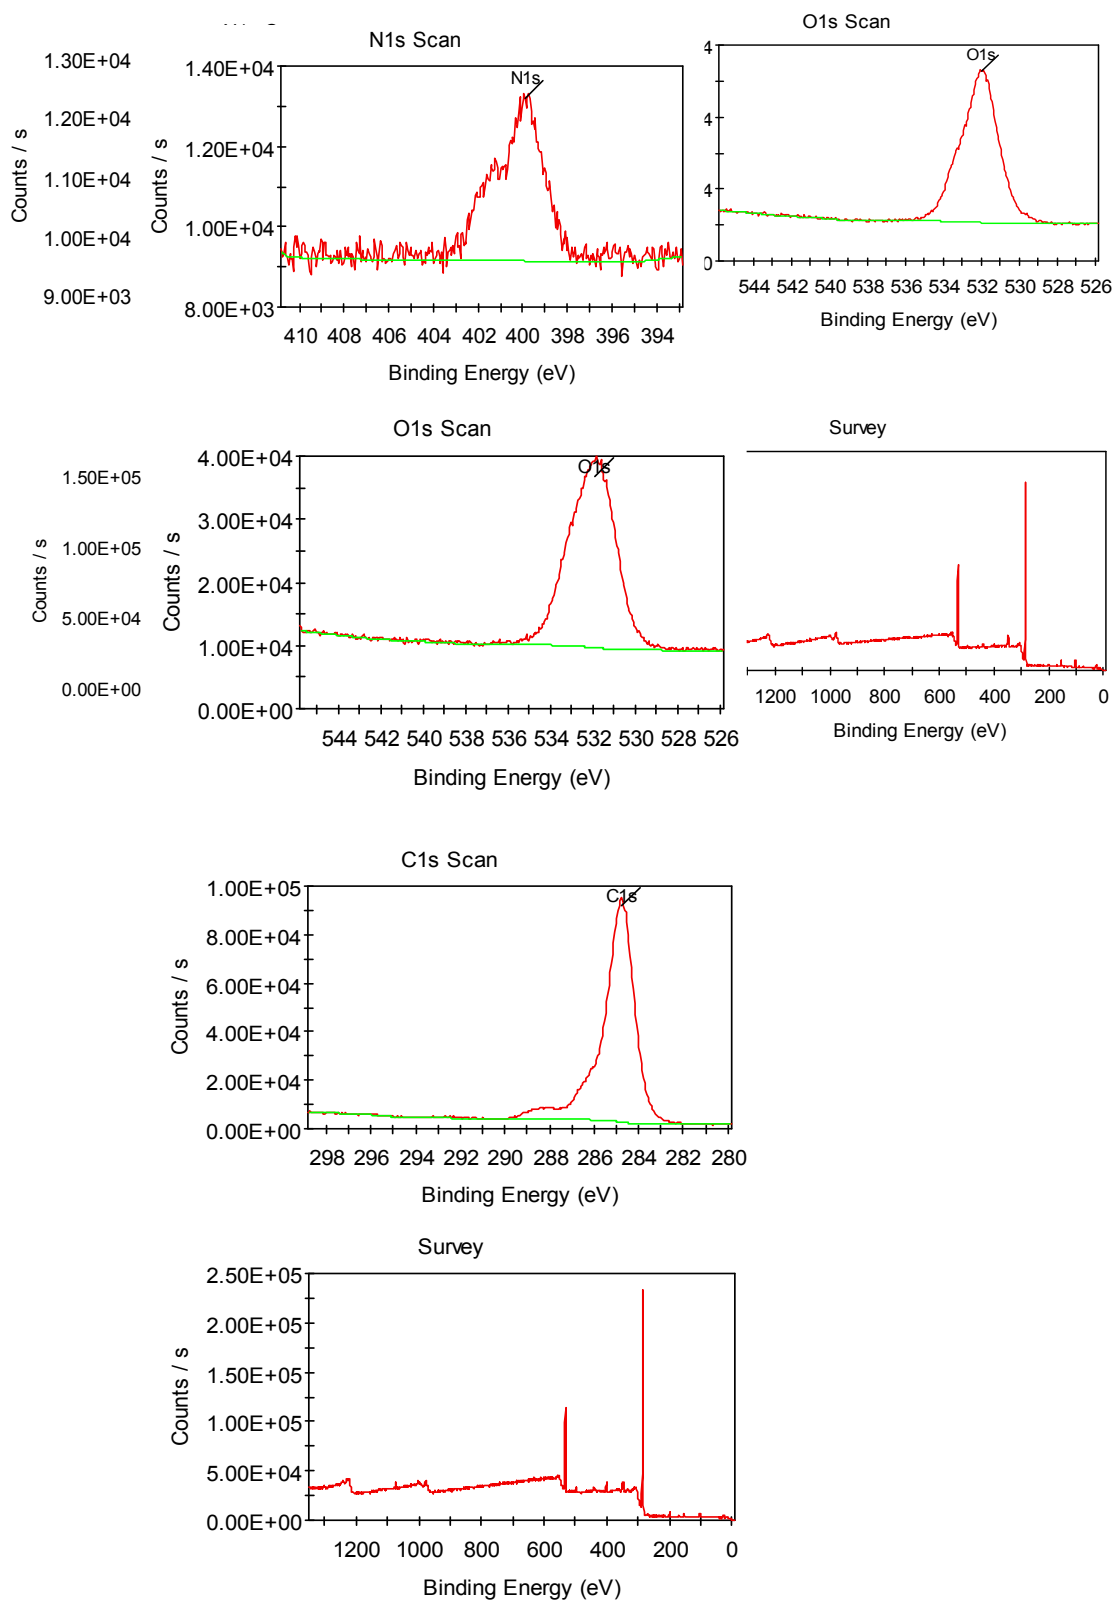

## 2. PEEK-PDA

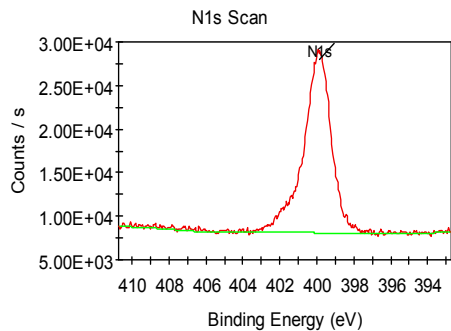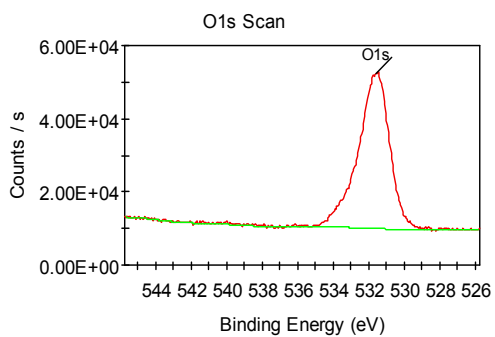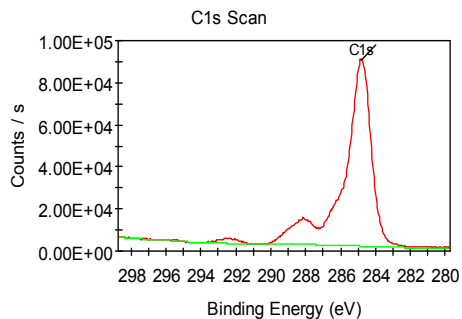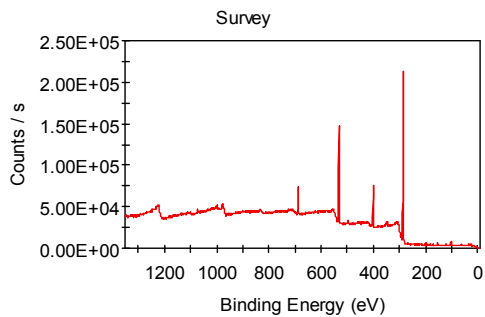

### 3. PEEK-PDA-KR12
